# Supplementary material for: Effects of Sleeve Gastrectomy vs. Roux-en-Y Gastric Bypass on Eating Behavior and Sweet Taste Perception in Subjects with Obesity
Source: MDPI journal article supplement (doi:10.3390/nu10010018), 2017-12-24
Supplement: s1 [file s1]

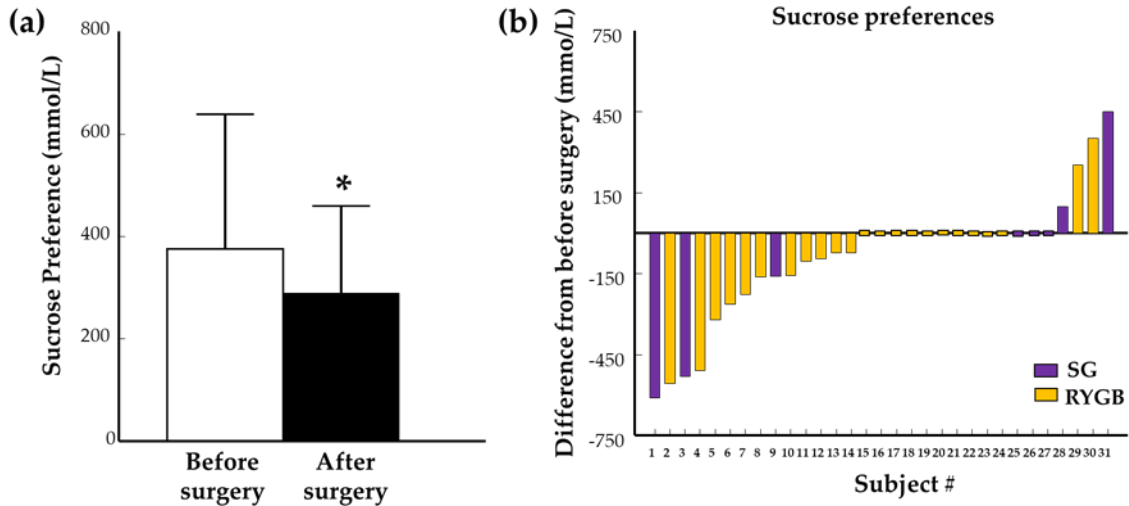

**Figure S1:** Sucrose preferences, (a) Sucrose preferences before (white bars) and after (black bars) ~20% weight loss induced by bariatric surgery. Two-way ANOVA revealed a main effect of time (before surgery vs. after surgery) ( $F_{(1,29)}=5.17$ ;  $p=0.03$ ). RYGB and SG groups were combined because there was no main effect of group ( $p=0.26$ ) nor interaction ( $p=0.64$ ). Data are median values  $\pm$  semi-interquartile range. \* $p=0.03$ . (b) Individual differences in sucrose concentrations preferred after surgery compared to sucrose concentrations preferred before surgery. RYGB, Roux-en-Y Gastric Bypass; SG, Sleeve Gastrectomy.
